# Supplementary material for: Sirtuins 1 and 2 in the Acute Period After Photothrombotic Stroke: Expression, Localization and Involvement in Apoptosis
Source: PubMed Central journal article supplement (PMC9092253; doi:10.3389/fphys.2022.782684), 2022-04-27
Supplement: Image1.pdf [file Image1.pdf]

## Supplementary Material

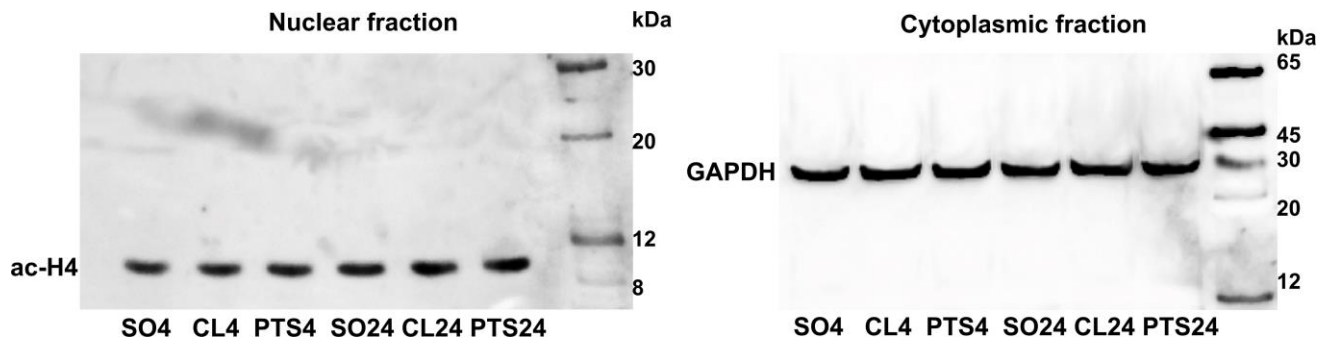

**Supplementary Figure 1.** Evaluation of the purity of the obtained nuclear and cytoplasmic fractions by Western blotting of penumbra tissue 4 h (PTS4) and 24 h (PTS24) after photothrombotic stroke in rats; cerebral cortex of the intact contralateral hemisphere (CL4 and CL24), as well as the cerebral cortex of sham operated animals 4 h (SO4) and 24 h (SO24) after irradiation. Acetylated histone H4 (ac-H4) protein was used as a nuclear fraction marker. We used Antiacetyl-Histone H4 produced in rabbits (# 06-866, Merck) at a dilution of 1:500. The protein glyceraldehyde-3-phosphate dehydrogenase (GAPDH) was used as a marker of the cytoplasmic fraction. We used the Anti-GAPDH antibody produced in rabbits (G9545, Sigma Aldrich) at a dilution of 1:1000.
